# Supplementary material for: Structure searches and superconductor discovery in XB2 (X = Sc, Ti, V, Cr, and Tc)
Source: Royal Society of Chemistry journal article supplement (doi:10.1039/d3ra08746h), 2024-01-01
Supplement: d3ra08746h1.pdf [file d3ra08746h1.pdf]

## Supplementary Material for Structure searches and superconductor discovery in $\text{XB}_2$ (X= Sc, Ti, V, Cr, and Tc)

Jingjing Meng<sup>1</sup>, Pengyu Zheng<sup>1</sup>, Yiran Peng<sup>1</sup>, Rui Liu<sup>1</sup>, Ying Yang<sup>1</sup>, Zhiping Yin<sup>1,2\*</sup>

<sup>1</sup>Department of Physics and Center for Advanced Quantum Studies, Beijing Normal University, Beijing 100875, China

<sup>2</sup>Key Laboratory of Multiscale Spin Physics (Ministry of Education), Beijing Normal University, Beijing 100875, China

| Compound         | Formation enthalpy<br>(eV/atom) | Lattice parameter (Å) |      |           |
|------------------|---------------------------------|-----------------------|------|-----------|
|                  |                                 | a                     | c    | $\lambda$ |
| ScB <sub>2</sub> | -0.85                           | 3.14                  | 3.52 | 0.28      |
| TiB <sub>2</sub> | -1.08                           | 3.04                  | 3.22 | 0.1       |
| VB <sub>2</sub>  | -0.73                           | 3.0                   | 3.0  | 0.3       |

**TABLE SI.** Formation enthalpy and lattice parameter, the calculated electron-phonon coupling strength ( $\lambda$ ) for compounds of ScB<sub>2</sub>, TiB<sub>2</sub>, and VB<sub>2</sub> at ambient pressure.

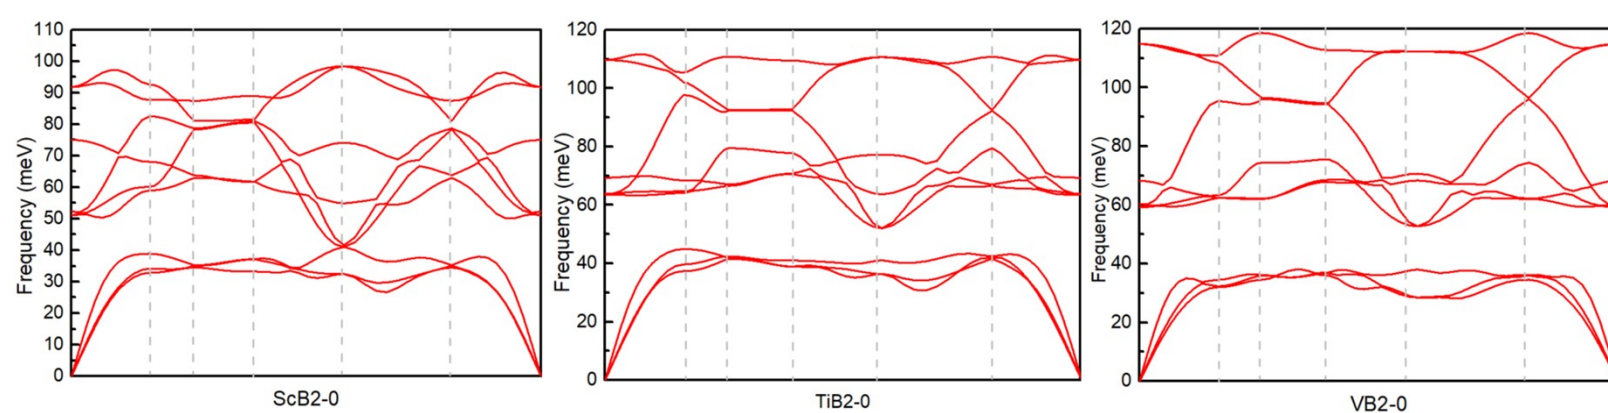

Fig. S1. phonon-dispersion curves of ScB<sub>2</sub>, TiB<sub>2</sub>, and VB<sub>2</sub> at ambient pressure.

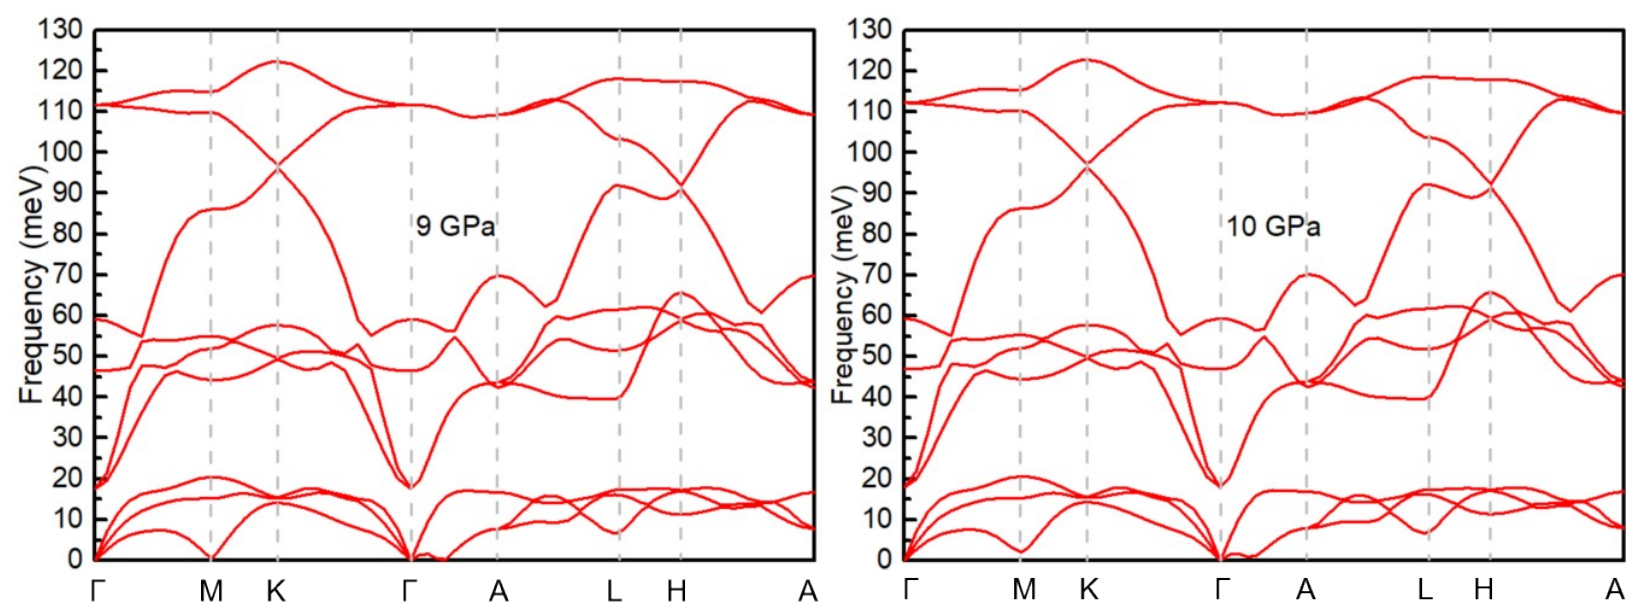

Fig. S2. Phonon-dispersion curves of TcB<sub>2</sub> at 9 GPa and 10 GPa.

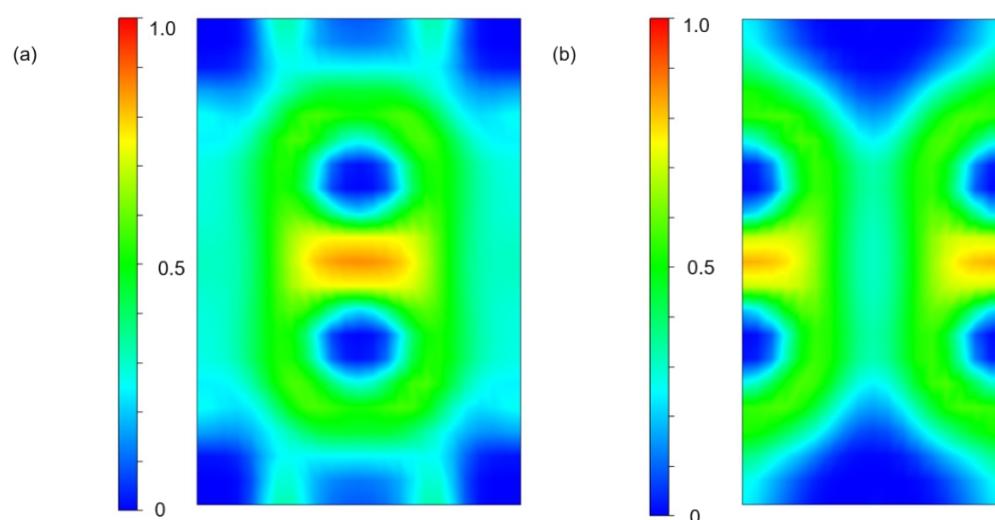

Fig. S3. The calculated ELF of (a) TcB<sub>2</sub> at 20 GPa and (b) CrB<sub>2</sub> at 108 GPa on the (1 1 0) plane.
